# Supplementary material for: System vulnerability and risk assessment of railway systems to flooding
Source: Copernicus journal article supplement (doi:10.5194/nhess-2021-188), 2021-07-08
Supplement: Supplementary file [file nhess-2021-188-RC2-supplement.pdf]

# System vulnerability and risk assessment of railway systems to flooding

Weihua Zhu<sup>1,2</sup>, Kai Liu<sup>1, 2\*</sup>, Ming Wang<sup>1,2</sup>, Philip J. Ward<sup>3</sup>, Elco E. Koks<sup>3</sup>

<sup>1</sup> State Key Laboratory of Earth Surface Processes and Resource Ecology, Beijing

100875, China

<sup>2</sup> Academy of Disaster Reduction and Emergency Management, Faculty of

Geographical Science, Beijing Normal University, Beijing 100875, China

<sup>3</sup> Institute for Environmental Studies (IVM), Vrije Universiteit Amsterdam, 1081 HV

Amsterdam, Netherlands

† Address correspondence to Kai Liu, State Key Laboratory of Earth Surface Processes and Resource Ecology, Beijing Normal University, #19 Xijiekou Wai Ave., Beijing 100875, China; liukai@bnu.edu.cn.

**ABSTRACT:** Floods have negative effects on the reliable operation of transportation systems. In China alone, floods cause an average of ~1125 hours of railway service disruptions per year. In this study, we present a simulation framework to analyse the system vulnerability and risk of the Chinese railway system to floods. To do so, we have developed a novel methodology for generating flood events at both the national and river basin scale. The resulting event set provides the basis for national- and provincial-level railway risk assessments, focusing in particular on affected trains, affected passengers and increased time for detoured trains. The results show that due to spatial

1 variations in the railway topology and traffic flows, the system vulnerability of the  
2 Chinese railway system to floods ~~in different basins~~ is highly heterogeneous. Flood  
3 events in the Yangtze River Basin show the largest impact on the national railway system,  
4 with approximately 40% of the national daily trains being affected by a 100-year flood  
5 event in that basin. At the national level, the average number of daily affected trains  
6 and passengers for the national system are approximately 200 trips and 165,000 people  
7 (2.7% and 2.8% of the total daily numbers of trips and passengers), respectively. In  
8 addition, the mean average increased time for detoured trains reaches approximately  
9 five hours. The event-based approach presented in this study shows how we can  
10 identify critical hotspots within a complex network, taking the first steps in developing  
11 climate-resilient infrastructure.

12 **KEYWORDS:** river basin flooding; railway system; risk assessment; system vulnerability

## 13 1. Introduction

14 Floods can have negative effects on transportation systems through both the  
15 destruction of physical infrastructure and the disruption of freight and traffic flows  
16 (Reed, 2004; Moran et al., 2010; Benn, 2013; Kellermann et al., 2015). For example,  
17 during the Tbilisi (Georgia) floods in June 2015, the estimated damage in terms of  
18 replacing affected assets was 14.8 million USD, whilst losses related to increases in  
19 travel time and ~~higher~~ operating costs were estimated at approximately three million  
20 USD (up until autumn 2015) (GFDRR, 2015). In May and June 2013, the Austrian Federal

1     Railways faced severe damage by the major floods in central Europe, with a total cost  
2     of more than 84 million USD. The event caused extensive damage to track structures  
3     and also caused widespread service disruptions, despite many protective actions that  
4     had been adopted ahead of time (Kellermann et al., 2016). In China, over 2146 rail  
5     service disruption events and over 20,825 hours of discontinued service due to flooding  
6     were reported from 2000 to 2016 (Editorial Board of China Railway Yearbook, 2001-  
7     2017). In 2016, the direct economic loss of the Chinese railway system caused by floods  
8     was approximately 80 million USD (Editorial Board of China Railway Yearbook, 2001-  
9     2017). As such, there is a clear need to evaluate the vulnerability of the transportation  
10    system to extreme flood hazards and to identify high-risk transportation components  
11    to make the transportation systems safer and more effective for operation and  
12    maintenance.

13       Many studies have investigated flood impacts on transportation systems, focusing on  
14    either flood vulnerability of assets (Kellermann et al., 2015; Pregnotato et al., 2017;  
15    Singh et al., 2018; Koks et al., 2019) or the risk to the entire system (Gil and Steinbach,  
16    2008; Kellermann et al., 2016; Lamb et al., 2019). In these studies, flood vulnerability is  
17    usually defined as the relationship between the characteristics of the transportation  
18    components (i.e., the physical structure, traffic flow and traffic velocity) and the  
19    variables characterizing the intensity of the flood hazard (i.e., flood depth and flood  
20    velocity) (Pregnotato et al., 2017). However, as major river floods are usually driven by  
21    large-scale atmospheric circulations (Prudhomme and Genevier, 2011; Lavers et al.,

1 2013) and affect large areas, they can disrupt several components concurrently across  
2 a network system (Becker and Grünewald, 2003; Kundzewicz et al., 2013). Within a  
3 network system, the impact on operational performance is often the result of failure of  
4 multiple components in the aftermath of an event (Gong et al., 2017). As such, a  
5 system-level perspective is essential to properly assess transportation system  
6 vulnerability due to flooding.

7 Some studies have assessed transportation vulnerability to natural hazards from a  
8 system-level perspective (Chang et al., 2010; Hong et al., 2015). Chang et al. (2010)  
9 investigated the potential impacts of climate change on travel disruption in the  
10 metropolitan area of Portland, Oregon. They combined a hydrologic, hydraulic model  
11 and a travel forecast model to process their study. Hong et al. (2015) assessed the  
12 Chinese railway system's vulnerability in terms of traffic flow loss based on historical  
13 flood events from 1981 to 2010. Unfortunately, due to the widespread lack of  
14 appropriate historical flood hazard data and computational issues with running large-  
15 scale hydraulic models (Sene 2008; Chang et al. 2010), research so far has been carried  
16 out only on a case-study basis where historical scenarios are available (Hong et al.,  
17 2015). However, for inter-city and inter-country trade, national and global-scale  
18 transportation systems have flourished in recent decades. Examples include Pan-  
19 European transportation corridors (Janic and Vleugel, 2012) and the railway system of  
20 the Belt and Road Initiative (Yang et al. 2018); therefore, large-scale flood event data  
21 and methods should be improved to assess system-level vulnerability and risk on

1 operational performance for such large spatial transportation systems.

2 The recent development of global flood hazard maps (Alfieri et al., 2013; Hirabayashi  
3 et al., 2013; Ward et al., 2013; Sampson et al., 2015; Dottori et al., 2016) has paved the  
4 way for performing large-scale flood risk assessments. These global flood hazard maps  
5 have been widely applied to assess the global risk to flooding in terms of population  
6 (Ward et al. 2013; Arnell et al. 2016; Dottori et al. 2016), gross domestic product (GDP)  
7 (Ward et al., 2013; Winsemius et al., 2013), economic damage (Ward et al., 2013;  
8 Dottori et al., 2016; Winsemius et al., 2016; Ward et al., 2017), and transportation  
9 infrastructure (Koks et al., 2019). Koks et al. (2019), for example, assessed the direct  
10 economic damage to transportation infrastructure assets using a conventional damage  
11 assessment approach through asset-specific fragility curves based on global flood data.  
12 Studies such as these facilitate a better understanding of the impacts of flood hazards  
13 on large-scale transportation systems and provide up-to-date knowledge on risk  
14 analysis frameworks.

15 This study aims to develop a framework to quantify the system vulnerability and risk  
16 in transportation systems in terms of operational performance loss under large-scale  
17 flood hazards. System vulnerability in this study is represented as the system  
18 performance loss with different flood intensities. Most studies use regional- or national-  
19 scale flood footprints, which show the flood depth for a given return period in that area.  
20 In reality, the presented floods in such as a flood footprint may not all happen at the  
21 same time. When assessing possible cascading effects, the use of independent flood

1 events is therefore necessary (Nones and Pescaroli, 2016). As such, we develop a  
2 method for generating a set of independent flood events at the national and river basin  
3 scale. Potential performance loss is assessed using network theory and a spatial analysis  
4 method. We illustrate our methodology by applying it to the Chinese railway system.

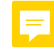

5 ~~The remainder of~~ the paper is organized as follows. In section 2, we propose a  
6 framework for the evaluation of system vulnerability and risk of flood hazards to  
7 transportation systems and use the Chinese railway system for application, including  
8 how to generate flood events, define the network system for the transportation system,  
9 calculate system vulnerability metrics, and quantify flood risk. Section 3 presents the  
10 main findings and results. Section 4 and Section 5 provide the discussion and conclusion,  
11 respectively, to this article.

## 12 2. Data and method

13 Flood risk can be defined as a function of flood hazard, exposure and its related  
14 vulnerability. A flood hazard is usually characterised by its intensity and occurrence  
15 probability; exposure refers to the population and assets exposed to flooding; and  
16 vulnerability is often defined as the loss ratio of people or assets suffered to different  
17 intensity of hazard (Gouldby and Samuels, 2009; Haimes, 2009; UNISDR, 2011;  
18 Winsemius et al., 2013). In this work, exposure is represented by the railway network  
19 exposed to the flood hazard. Asset vulnerability is defined as the failure of a railway  
20 asset based on the design standard and is expressed as a failure threshold. If the failure

1 threshold is exceeded, the service of the component is assumed to be disrupted,  
2 resulting in a 100% performance loss of that asset. System vulnerability is represented  
3 as the system performance loss with different flood intensities. Risk is calculated as the  
4 expected annual performance loss at the national and provincial levels.

5 Figure 1 presents an overview of the framework used in this study. First, we generate  
6 a national- and river basin-scale flood event set. To do this, we use flood hazard maps  
7 for different return periods at the national scale, taken from a global flood hazard model.  
8 We then divide these into flood hazard maps for the major river basins and use a curve-  
9 fitting method to estimate the flood depth for any return period for any cell. We then  
10 apply a Monte Carlo sampling method (Metropolis 1987) to generate the flood events  
11 per river basin and aggregate these events to the national scale. Second, we define the  
12 railway system as a network using network theory (Newman, 2010). Third, we intersect  
13 the flood events with the railway network to identify the disrupted segments in the  
14 railway system based on a pre-defined failure threshold. In the last part of our analysis,  
15 we assess the system vulnerability and risk in terms of several performance loss metrics,  
16 including the daily cancelled trains and cancelled passengers, the daily detoured trains  
17 and detoured passengers, the daily affected trains and affected passengers, as well as  
18 the total increased time and the average increased time for the detoured trains. We  
19 also analyse the parameters in the failure threshold sensitivity to the risk result and the  
20 related risk uncertainty.

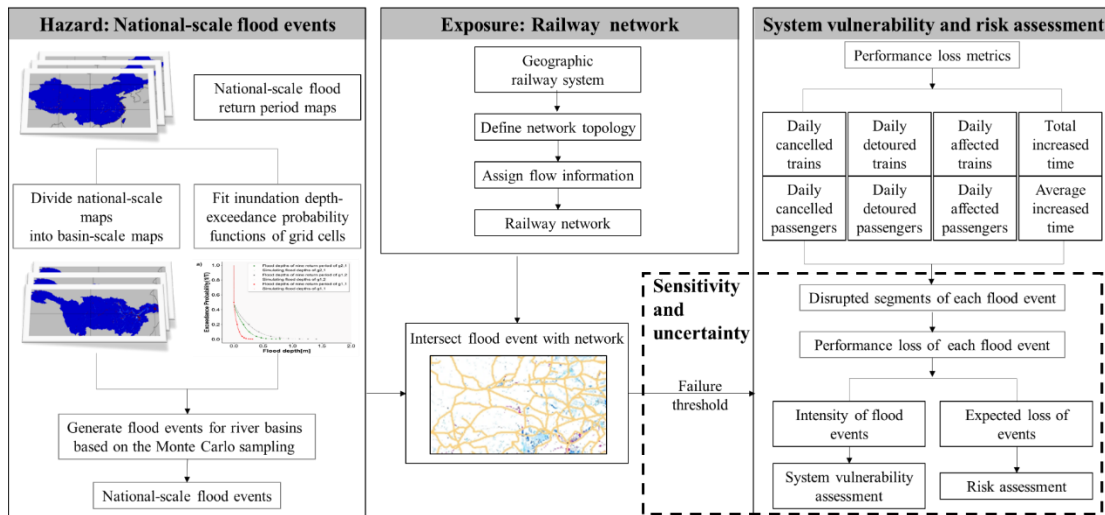

*Fig. 1 Methodology of the flood system vulnerability and risk assessment of railway infrastructure.*

## 2.1 National-scale flood event generation

To ensure the estimation is as accurate as possible for an event-based flood risk assessment, a large number of independent flood events are required (Speight et al., 2017; Wu, 2019; Zhu et al., 2020). In this study, we apply a curve-fitting method and a Monte Carlo sampling method to generate independent flood events using global flood hazard maps from GLOFRIS for multiple return periods (Ward et al., 2013). In brief, for each grid cell, we obtain the flood depth from the flood hazard maps for nine different return periods (2-1000 years). We then fit an inundation depth-exceedance probability function through these data points, which is used to estimate the flood depths for any return period. Based on these functions per cell, we apply a Monte Carlo sampling method to produce basin-specific flood events, which are further combined into a national independent flood event set (see Section 2.1.3). In this study, we assume that a flood event within one basin will produce a flood with the same intensity (return



1 period) within that entire basin, whilst we assume that floods between different basins  
2 are independent of each other (Fraiture, 2007; Rojas et al., 2013). In the following  
3 subsections, we describe the input flood hazard maps, the function fitting procedure,  
4 and the Monte Carlo analysis in more detail.

### 5 **2.1.1 Input flood hazard maps**

6 Our flood hazard data are extracted from the GLOFRIS global fluvial flood hazard  
7 maps of Winsemius et al. (2013), which are developed using the methods provided in  
8 Ward et al. (2013) and Winsemius et al. (2013). The GLOFRIS flood hazard dataset is a  
9 global 30-arcsecond (ca. 1-km) resolution gridded dataset. Hazard maps are provided  
10 for nine return periods (2, 5, 10, 25, 50, 100, 250, 500, and 1000 years). We divide China  
11 into nine major river basins (Fig. 3) according to the main river system<sup>1</sup> (Liu et al., 2009):  
12 the Continental Basin, Haihe River Basin, Huaihe River Basin, Pearl River Basin, Songhua  
13 and Liaohe River Basin, Southeast Basin, Southwest Basin, Yellow River Basin and  
14 Yangtze River Basin. As such, we extract the flood hazard data for each of these river  
15 basins.

### 16 **2.1.2 Fitting procedure**

17 For each grid cell, the GLOFRIS maps estimate the flood depth for the nine  
18 aforementioned return periods. To estimate the flood depth for any return period, we

---

<sup>1</sup> Geographic Data Sharing Infrastructure, College of Urban and Environmental Science, Peking University (<http://geodata.pku.edu.cn>).

1 fit a quadratic spline function to develop an inundation depth-exceedance probability  
 2 function ( $p$ ) for each grid cell (Marsden, 1974; Vandebogert, 2017; Meshram et al.,  
 3 2018). The quadratic spline is a method that uses a piecewise quadratic function to  
 4 obtain the best-fitting curves. This interpolation method allows us to obtain a smooth  
 5 continuous curve through the provided flood depths for the different return periods.

6 The method is applied as follows. For each grid cell, the annual exceedance  
 7 probability flood depth  $D_T$  is calculated by Eq. 1:

$$8 \quad P(D_T) = \frac{1}{T} \quad (1)$$

9 where  $D_T$  is the magnitude of a flood depth with return period of  $T$ - year,  $P(D_T)$   
 10 is the exceedance probability of  $D_T$ .  $D_T$  is between  $[D_1, D_{1000}]$ , with  $D_1 = D_2 \leq$

11  $D_5 \dots \leq D_{1000}$ . We assume that  $D_1$  is equal to zero (i.e., 1-year event with a flood depth

12 of 0 m) and is the same as that of a 2-year event (the lowest return period in the

13 GLOFRIS dataset). Let  $Pr(D_T)$  denote a quadratic, continuously differentiable

14 function of  $P(D_T)$ . Then, by definition:

$$15 \quad Pr(D_T) = aD_T^2 + bD_T + c \quad (2)$$

16 For each ~~interval of~~ grid cell  $g_{x,y}$ , we can obtain its piecewise quadratic function by

17 Eq. 3:

$$18 \quad Pr_{x,y}(D_T) = \begin{cases} Pr_{x,y}^1(D_T) = a_1D_T^2 + b_1D_T + c_1 & D_T \in [D_1, D_{1-T}] \\ Pr_{x,y}^2(D_T) = a_2D_T^2 + b_2D_T + c_2 & D_T \in [D_{1-T}, D_{2-T}] \\ \dots & \dots \\ Pr_{x,y}^p(D_T) = a_pD_T^2 + b_pD_T + c_p & D_T \in [D_{p-1-T}, D_{p-T}] \end{cases} \quad (3)$$

19 where  $Pr_{x,y}(D_T)$  is a set of continuous inundation depth-exceedance probability

20 functions consisting of  $p$  continuous quadratic functions. For

1  $a(a_1, a_2, \dots, a_p), b(b_1, b_2, \dots, b_p), c(c_1, c_2, \dots, c_p) \in \mathbb{R}$ , we can calculate these constants  
2 by bracketing the critical point of  $P(D_T)$  and derivative of the function  $Pr_{x,y}(D_T)$ ;  
3 details on the interpolation methods can be found in a previous study by Sun and Yuan  
4 (2006). We assume that only one event occurs per year in each basin. Examples of the  
5 inundation depth-exceedance probability function of grid cells are shown in Fig. 2a.

### 6 2.1.3 Simulation procedure

7 To produce a time-series of flood events based on the created inundation depth-  
8 exceedance probability functions (Section 2.1.2), we use a Monte Carlo sampling  
9 method. The basic idea of the Monte Carlo sampling method is that when the number  
10 of simulations is sufficiently large, the frequency of an event approximates the  
11 probability of the occurrence of the event (Baker, 2008; Speight et al., 2017). The flood  
12 event generation procedure is presented in Fig. 2 and Appendix Fig. A. 1 and can be  
13 summarized in two steps. First, we generate a set of independent events at the basin  
14 scale. For each event  $E_j^i$ , and for each basin  $B_j$ , a random number  $P_j^i$  between 0 and  
15 1 is generated from a uniform distribution. The flood depth of the cells in basin for  
16 event  $E_j^i$  can be calculated using  $P_j^i$  and the inundation depth-exceedance  
17 probability function based on the assumption that a flood event in one basin will  
18 produce a flood with the same intensity. This concept is presented in Fig. 2a-b. Second,  
19 we generate a set of national-scale independent flood events. For a national-scale flood  
20 event, basin-specific floods of nine basins can be randomly combined into a national-

- 1 scale flood by assuming independence between the flood events among different
- 2 basins, as presented in Fig. 2c-d.

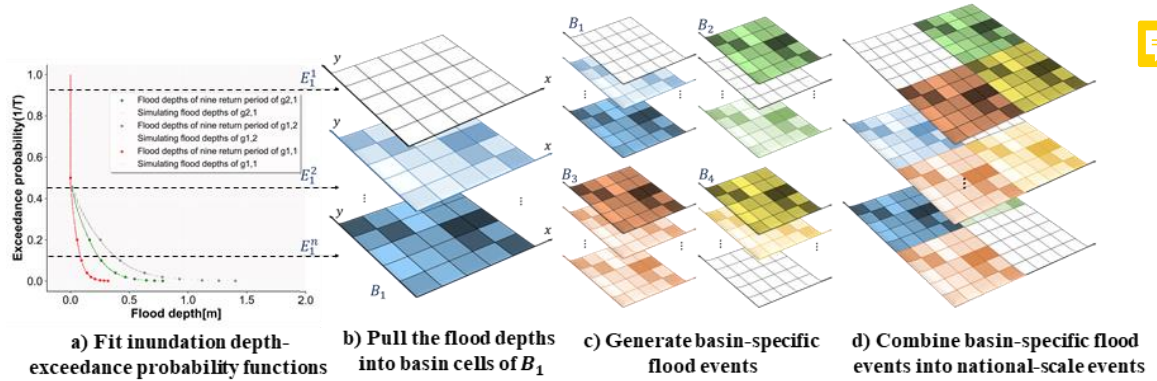

Fig. 2 A flowchart of national-scale flood event generation.  $E_1^1$  (the top layer in b) is a flood event in basin  $B_1$ , where  $P_1^1 = 0.93$ ;  $E_1^2$  (the middle layer in b) is a flood event in basin  $B_1$ , where  $P_1^2 = 0.45$ ; and  $E_1^3$  (the lower layer in b) is a flood event in basin  $B_1$ , where  $P_1^3 = 0.17$ . The upper-left layers in c) are a basin-scale flood set of basin  $B_1$ , the upper-right layers in c) are a basin-scale flood set of basin  $B_2$ , the lower-left layers in c) are a basin-scale flood set of basin  $B_3$ , and the lower-right layers in c) are a basin-scale flood set of basin  $B_4$ . The top layer in d) is combined with the top four layers in c) (the four basin-scale floods of basin  $B_1, B_2, B_3$  and  $B_4$  combine into a national-scale flood event).

For each year, we assume that within each basin, only one flood event can occur. For each basin to obtain 10,000-year events (we assume that 10,000-year of events are sufficient to cover almost all probable scenarios), we therefore apply a Monte Carlo method to sample 10,000 exceedance probabilities. For each of these exceedance probabilities, we estimate the inundation depth for each cell within that basin (i.e., assuming that the exceedance probability is the same throughout the entire basin). We repeat this procedure for each basin, which results in a 10,000-year set of flood events for each basin. We then combine these sets into a national scale flood event set by

1 assuming independence between the flood events in the different river basins (Fig. 2d).

2 Hence, for each of the 10,000 years, we simply take the estimated flood depths for each

3 basin. For example, in year 1, basin 1 may have an exceedance probability of 0.5, whilst

4 basin 2 may have an exceedance probability of 0.98. For year 1, the resulting national-

5 scale flood map would therefore have values for a flood event with an exceedance

6 probability of 0.5 in basin 1, a flood event with an exceedance probability of 0.98 in

7 basin 2, and so forth. This procedure results in a 10,000-year national-scale flood event

8 set.

9 We also assess the system vulnerability by calculating the impacts that could occur

10 throughout China if a flood with a given return period were to occur within an individual

11 basin. To do this, for each basin and each return period we draw 10,000 events for all

12 other basins assuming independence. In total, this leads to a set of 810,000 events

13 (10,000 events x 9 return periods x 9 basins).

## 14 2.2 Railway network building

15 Railway systems are commonly represented through spatially explicit networks as an

16 analogy for their structure and flows (Rodrigue, 2016). This network representation can

17 be used to calculate system performance metrics based on network theory. In this work,

18 the Chinese railway system was modelled as a directed weighted network, which

19 consists of a group of nodes (stations) ~~and~~ connected by edges (railway lines) with daily

20 train trips, where the edges have a travel direction associated with them. To build the

1 Chinese railway network, we use the geographic information of railway system from  
2 OpenStreetMap (OSM) and the timetable data including daily number of trains and  
3 associated routes from the Railway Service Website (Liu et al., 2018; Zhu et al., 2020).  
4 As our method is primarily concerned with flood risk along rail segments between cities  
5 and not within cities, for simplicity, we combine multi-stations into one node using the  
6 location of the highest capacity station in each city. In total, 2240 nodes are combined  
7 into 1790 nodes. The final extracted railway network has a total length of 90,600 km for  
8 (merged parallel) lines connecting two identical stations, consisting of 1973 edges and  
9 1790 nodes (Fig. 3). Figure 3 shows the spatial distribution of the railway network and  
10 average daily numbers of trains. Topology and traffic flows vary greatly in spatial space.  
11 The network density, reduces greatly moving from Eastern China to Western China. For  
12 the traffic flow, the railways connect large cities, like the railways from Beijing to  
13 Guangzhou, Harbin and Shanghai, and railway from Shanghai to Changsha have higher  
14 flows.

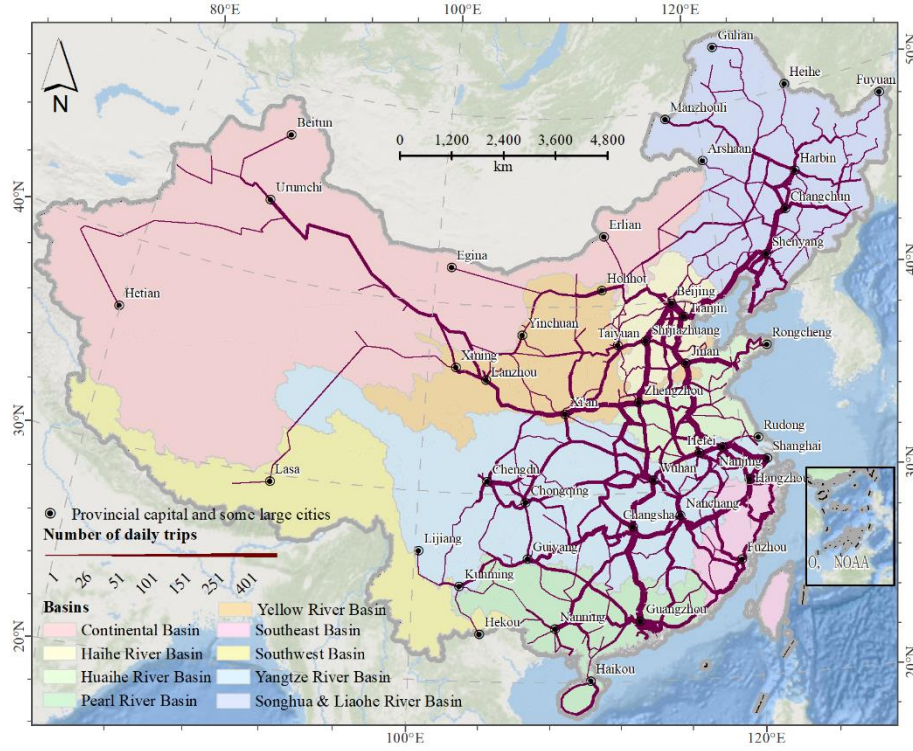

**Fig. 3 The spatial distribution of the railway network and average daily numbers of trains.**

### 2.3 Failure condition based on an event

We assume that a railway is impassable when the water level on the railway line is higher than the failure threshold  $Wd$  of the railway service after drainage (CRPH, 2012; Espinet et al., 2018). The water level after drainage  $WL_{x,y}$  of grid cell  $g_{x,y}$  is calculated by Eq. 4:

$$WL_{x,y} = D_{T_{x,y}} - Wld_{x,y} * Dc \quad (4)$$

where  $D_{T_{x,y}}$  is the flood depth of a flood event,  $Wld_{x,y}$  is the water level of the design standard (i.e., the return period  $t$ ) of grid cell  $g_{x,y}$ , and  $Dc$  is the drainage capacity rate.

The rail segment  $l_{ij}$  between two stations failure condition is defined by Equations 5 and 6:

$$Fc_{ij} = \prod_{xy}^{ij} Z(xy) \quad (5)$$

$$Z(xy) = \begin{cases} 0, & WL_{x,y} \geq Wd \\ 1, & WL_{x,y} < Wd \end{cases} \quad (6)$$

$Fc_{ij}$  is the failure condition of component  $l_{ij}$ , which has two states, namely, normal (denoted by 1) and disrupted (denoted by 0), resulting in 100% disruption.  $Z(xy)$  is the failure condition of grid cell  $g_{x,y}$ ; when the water level after drainage is larger than  $Wd$ ,  $Z(xy)=0$ ; otherwise,  $Z(xy)=1$ .

In this study, we consider a failure threshold of 0.2 m after drainage, according to the railway transportation emergency plan (CRPH, 2012; Espinet et al., 2018). The flood design standard of the culverts, bridge and embankments of the Chinese national railway system is designed for 100 year in China, according to the standard for flood control (CRPH, 2016). Furthermore, we assume that the drainage capacity rate is 0.8 of water level of the design standard, and it reduces the total amount of water that the railway structure can actually drain (TB 10001, 2016; Espinet et al., 2018).

Failure hotspots of railway segments  $l_{ij}$  can be found by the annual failure probability  $AF_{ij}$ , which is calculated by Eq. 7:

$$AF_{ij} = \frac{\sum_e^E FC_{ij}^e}{N} \quad (7)$$

where  $AF_{ij}$  is the failure probability to the railway segments,  $E$  is the N-year flood events catalogue, and  $FC_{ij}^e$  is the failure condition of railway segment  $l_{ij}$  under flood event  $e$ .



## 2.4 Calculating system vulnerability and risk

### 2.4.1 Performance loss metrics

#### *Daily affected trains and the associated daily affected passengers*

Once a flood occurs, trains may be affected in two ways: (i) increased travel time; or (ii) cancellation. The number of daily affected trains  $N_e^{tol}$  is calculated by Eq. 8:

$$N_e^{tol} = N_e^c + N_e^d \quad (8)$$

Where  $N_e^c$  the number of daily is cancelled trains and  $N_e^d$  is the number of daily detoured trains after a flood event.

We assume that the average number of passengers is 80% of the train's capacity (Wei et al., 2017)(Rezvani et al., 2015)(Rezvani et al., 2015)(Rezvani et al., 2015). As such, the number of affected passengers  $P_e^{tol}$  can be defined by Eq. 9:

$$P_e^{tol} = \sum_i^{(N_e^c + N_e^d)} CA_i * 0.8 \quad (9)$$

where  $CA_i$  is the capacity of the  $i$ th train.

#### *Daily detoured trains and the associated daily detoured passengers*

Once a flood occurs, some trains will detour to complete their journeys. The daily detoured trains  $N_e^d$  can be calculated based on four assumptions as follows (in order of descending priority), which is also presented in Appendix Fig. A. 2:

- ① Stations are not repeated along the routes;
- ② The train passes the largest number of original stations along the detoured route;



$$N_e^c = N_s - N_e^s \quad (13)$$

where  ~~$N_e^c$  is the daily cancelled trains after a flood event~~,  $N_e^s$  is the number of running trains in the system after a flood event, and  $N_s$  is the original number of trains in the system.

Daily cancelled passengers  $P_e^c$  can be defined by Eq. 14:

$$P_e^c = \sum_i^{(N_e^c)} CA_i * 0.8 \quad (14)$$

~~where  $N_e$  is the daily cancelled trains and  $CA_i$  is the capacity of the  $i$ th train.~~

#### 2.4.2 Calculating system vulnerability and risk

Each performance loss metric is calculated for each flood event. System vulnerability curves are generated to present the relationship between performance loss and flood intensity (return period). We use the expected daily affected trains, cancelled trains, detoured trains, affected passengers and increased time for detoured trains to present the flood risk to the railway system according to Eq. 15:

$$AR_s = \frac{\sum_e^E V_e}{N} \quad (15)$$

where  $AR_s$  is the expected daily flood risk level to the railway system,  $E$  is the N-event flood catalogue, and  $V_e$  is the performance loss metric, i.e.,  $N_e^d$ ,  $N_e^c$ ,  $N_e^{tol}$ ,  $P_e^d$ ,  $P_e^c$ ,  $P_e^{tol}$ ,  $T_e^{tol}$ , and  $T_e^{ave}$  under flood event  $e$ , which is defined in Eqs. 9-14.

### 2.5 Uncertainty and sensitivity analysis

By applying an uncertainty analysis (UA), we identified the range of model output for

1 imprecisely known input parameters (De Moel et al., 2012). A sensitivity analysis (SA)  
2 aims to determine the parameter effect on the model output (Koks and Haer, 2020).  
3 Parameters with greater effect should attract more additional attention to deal with the  
4 uncertainty they bring (Koks and Haer, 2020; De Moel et al., 2012). Detailed methods  
5 of uncertainty and sensitivity analysis can be found in previous studies by De Moel  
6 (2011) and Koks and Haer (2020).

7 In this study, we make assumptions on the train disruption threshold using three  
8 parameters (the water level failure threshold, drainage capacity rate, and design  
9 standard) based on emergency code and design code standards (CRPH 2012). However,  
10 it should be noted that these standards are not known exactly for each asset and will  
11 change over time, such as dynamically changing protection standards and ageing  
12 infrastructure. Within a railway system, a lot of different asset types exist, with varying  
13 design standards. This implies that the capacity to cope with the hazard does vary from  
14 location to location. As such, it is worthwhile to perform a sensitivity analysis on these  
15 key parameters (De Moel and Aerts, 2011; Horacio et al., 2019). Hence, we perform an  
16 uncertainty and global sensitivity analysis in which we assess the performance loss  
17 metrics for a range of different values for these parameters. For water level failure, we  
18 use a range between 0.1 and 0.5 m. For the drainage capacity rate, we use a range  
19 between 0.7 and 0.9, and for the design standards, we use a range between 50 and 100  
20 years. The list of all assumptions taken in this study and their range in the sensitivity  
21 analysis can be found in appendix. In total, we create a set of 1000 different parameter

1 value combinations in the sample space.

## 2 **3 Results**

### 3 **3.1 Failure hotspots of railway segments**

4 The annual failure probability of the network segments is shown in Fig. 4 and is  
5 calculated based on the 10,000-year national flood event set. The results show a clear  
6 regional differentiation (Fig. 4a). Areas with high annual failure probabilities are mainly  
7 located in the Yangtze River Basin, Southeast Basin, and Pearl River Basin areas. These  
8 three basins have a humid subtropical climate and high precipitation levels in the rainy  
9 season during the summer; and these areas also have the highest railway density (Fig.  
10 3), mostly across rivers and located on flat area in China, which makes these railway  
11 lines susceptible to flood hazards.

12 Figure 4b shows the percentage of the length of railway lines that fall into each failure  
13 probability category for the national- and basin-level analyses. Nationally, the failure  
14 probability is greater than 0 for more than 55% of the total length of the railway lines.  
15 This percentage is heterogeneous across different river basins: it is highest in the  
16 Southeast Basin, followed by the Pearl River Basin and the Yangtze River Basin.  
17 Nationally, 6.8% of the length of the railway lines has a failure probability greater than  
18 0.02, with the highest proportions in the Yangtze River, Yellow River, and Southeast  
19 Basins, with 12.5%, 10% and 7.2%, respectively.

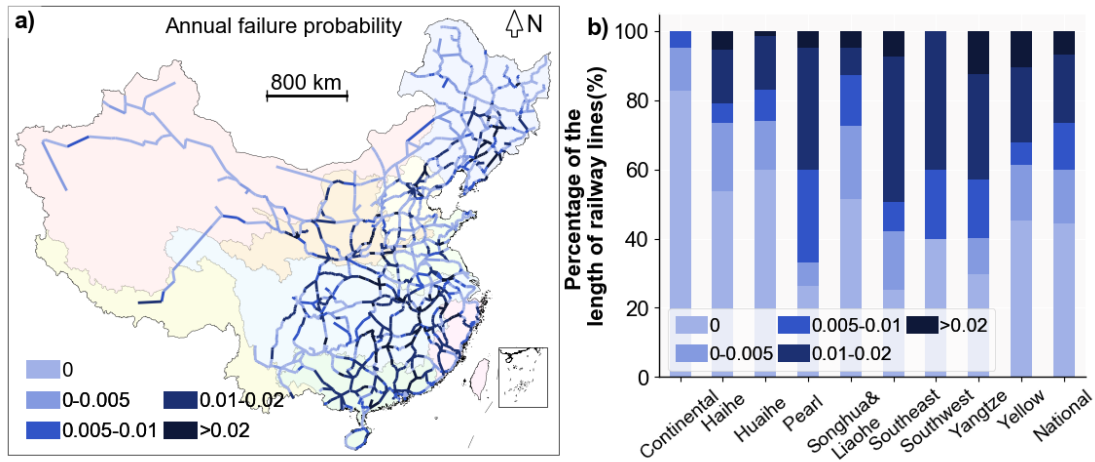

**Fig. 4 a) Annual failure probability map of the network segments affected by floods and b) the percentage of the length of railway lines for different failure probability categories per river basin**

### 3.2 Risk analysis of the Chinese railway system

The performance loss distribution curves of the railway system using the 10,000-year national-scale flood set are presented in Fig. 5. The results show that approximately 85% of the flood events have little effect (less than 0.01 of the daily trains and passengers) on the railway system from the perspective of all the performance metrics. For the daily affected trains, the absolute maximum number can reach 4200, and the average number is approximately 200 trips; these values represent 59% and 2.7% of the number of the daily trains. For the daily affected passengers, the absolute maximum number can reach 3,500,000, and the average number is approximately 165,000 people (60% and 2.8 of the number of the daily passengers). In addition, the largest average increased time for detoured trains can reach 14 hours and the mean average increased time for detoured trains is approximately 5 hours.

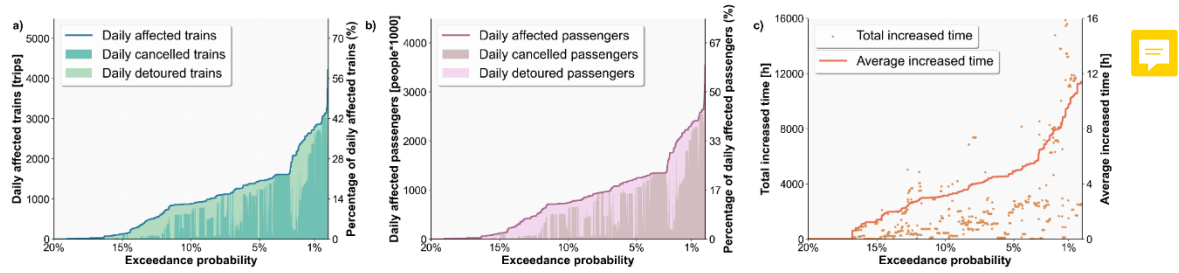

**Fig. 5 Exceedance probability-performance loss curves**

The performance losses per province of the railway system are presented in Fig. 6 for a range of metrics. The risk differs considerably between regions when expressed in different risk metrics. When examining the metrics of the daily affected trains and affected passengers, we find that the provinces in Central China, such as Henan, Hubei and Anhui, have the highest absolute and relative risks, estimated to be over 40 daily affected trains (4.5% relative to the number of the province's daily trains) and more than 35,000 daily affected passengers (3.5% relative to the number of the province's daily passengers). Interestingly, some provinces, such as Tibet Province, have a low risk in absolute terms but a high risk in relative terms because the Tibet Province has the smallest rail network and rail traffic density; only one line (i.e., Qinghai-Tibet Railway) crosses this region, which is therefore highly vulnerable to even a low-frequency flood hazard. Guangdong Province has the opposite results, with high risk in absolute terms and low risk in relative terms due to the large rail network and rail traffic density, which make the railway system more robust even with a high flood failure probability. The total and average increased time for detoured trains show contrasting results. The high risk in terms of the total increased time is mostly distributed in East China, whereas the

1 highest average increased time is distributed in western provinces such as Xinjiang and  
2 Tibet Provinces. From Eastern China to Western China, the traffic flow becomes  
3 significantly lower; more trains can be detoured with less time per trip in East China,  
4 and in the western provinces, fewer trains can be detoured but with more time per trip.

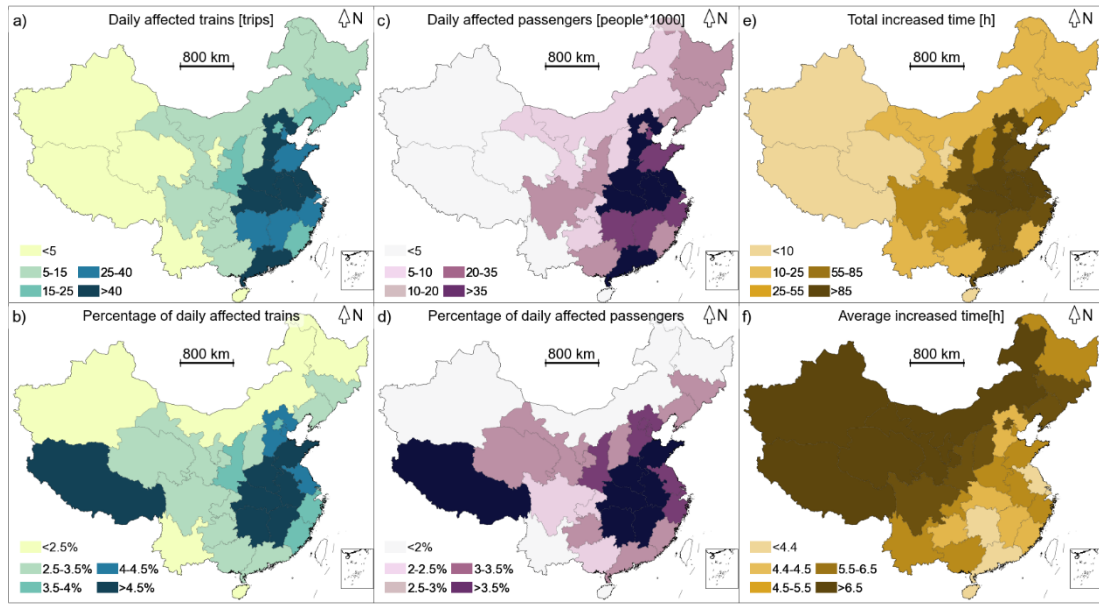

5 **Fig. 6 Performance loss of the railway system per province. a) The daily affected trains in**  
6 **absolute terms; b) the daily affected trains relative to the number of the province's daily trains;**  
7 **c) the daily affected passengers in absolute terms; d) the daily affected passengers relative to the**  
8 **number of the province's daily passengers; e) the daily total increased time for the detoured**  
9 **trains per province; and f) daily average increased time for the detoured trains per province.**

10 **Appendix Fig. A. 3 provides the risk map of detoured and cancelled trains and detoured and**  
11 **cancelled passengers. Appendix Fig. A. 4 provides a map of the Chinese provinces**

12 Several provinces appear at the highest level of the three metrics presented in Fig. 6  
13 and can be classified as particularly vulnerable provinces. Anhui Province, for example,  
14 has one of the highest absolute and relative levels of risk to trains and passengers in Fig.  
15 6a-d but also has the highest total increased time in Fig. 6e. Hubei Province shows one  
16



1 of the highest absolute and relative levels of risk to trains and passengers in Fig. 6a-d.  
2 Jiangsu Province has the highest absolute levels of risk to trains and passengers in Fig.  
3 6a and c and one of the highest total increased time in Fig. 6e. These provinces are at  
4 the highest risk compared to the other provinces.

### 5 **3.3 System vulnerability of the Chinese railway system**

6 Figure 7 presents system vulnerability curves based on the 810,000 simulated flood  
7 events and shows the performance loss metrics (namely, the percentage of daily  
8 affected trains and increased time) plotted against the return periods. The bottom-right  
9 plots for subfigures a and b show the national results, whilst the other figures show the  
10 results for each river basin. The colour shade represents the distribution of the flood  
11 performance loss, where the lines refer to the median performance loss value and the  
12 bounded lines refer to the 10th and 90th percentiles. The low-impact events cause the  
13 median values to be the same as the lower bound for the nine river basins as a result  
14 of their high frequency.

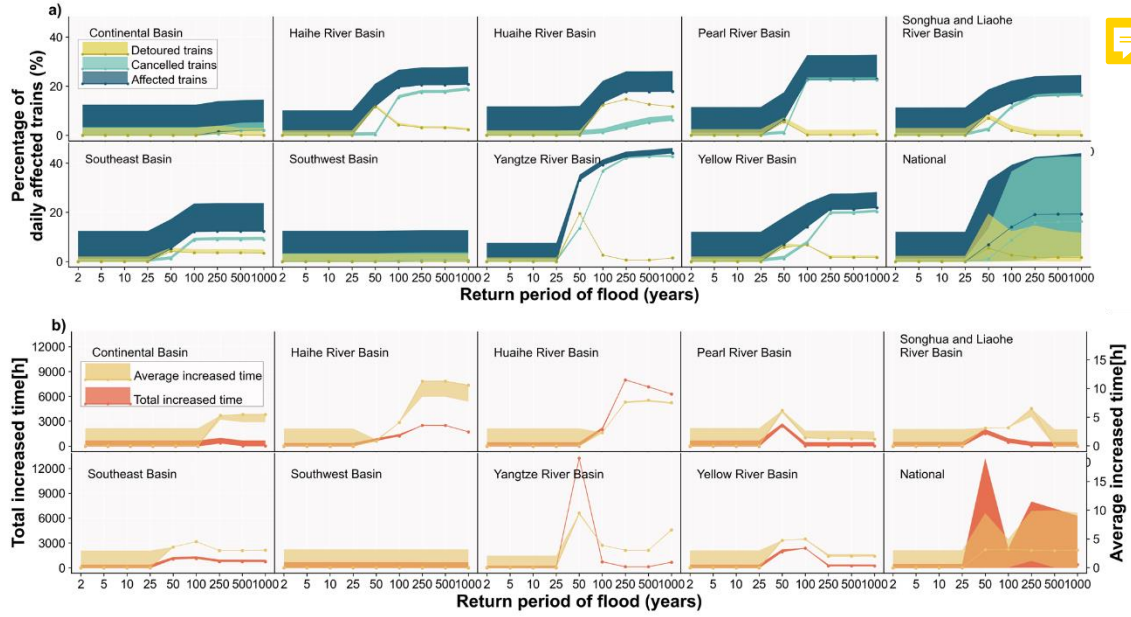

**Fig. 7 System vulnerability curves induced by river floods from the national flood event set, showing: a) the percentage of daily affected trains to the total number of daily trains and; b) the increased time for the detoured trains. The shading shows the distribution of the flood performance loss, where the lines refer to the median performance loss value and the bounded lines refer to the 10th and 90th percentiles. In the Appendix Fig. A. 5, we provide the system vulnerability curves for the passenger-level metrics. NB: for total increased travel time, the values can decrease at higher return periods – this is because some of the trains are cancelled and therefore there is no travel time for those trains**

Due to the different definitions and focus of each metric, the relationship between each metric and flood intensity is also different. From Fig. 7a, we can see that the percentage of daily affected trains and daily cancelled trains to the total number of daily trains increases with the increases of the return period of the flood events for the nine basins. The percentage of daily detoured trains to the total number of daily trains and the total and average increased time for detoured trains do not always increase with increasing return period shown in Fig. 7a and Fig. 7b. The median performance loss for

1 the five metrics is close to zero for floods with a return period below 25-years and  
2 remains stable when the flood hazard return period exceeds 100-years because of the  
3 railway design protection standards and assumed drainage capacity. Between the 25-  
4 year and 100-year flood events, the percentage of daily affected trains and daily  
5 cancelled trains relative to the total number of daily trains per flood event increases.  
6 The percentage of daily detoured trains relative to total daily trains and the total and  
7 average increased time, increases between the 25-year and 50-year flood events, and  
8 sharply decreases between the 50-year and 100-year events, especially for the Yangtze  
9 River, Yellow River and Pear River Basin floods. This is because most of the north-south  
10 rail lines in China, such as the Beijing-Guangzhou and Beijing-Jiulong lines, cross these  
11 basins. Most trains that are detoured for a 50-year event cannot be detoured for a 100-  
12 year event, as most of the north-south rail lines suffer failures at this hazard intensity.

13 When comparing the results between the nine river basins, we find that, in general,  
14 floods in the basins in central and eastern China have the highest impacts on the  
15 Chinese national railway system. The percentage of daily affected trains (cancelled and  
16 detoured trains) of the total number of trains is the largest for the Yangtze River Basin,  
17 followed by the Pearl River Basin and the Yellow River Basin. In the Yangtze River Basin,  
18 the median percentage of daily affected trains (cancelled and detoured trains) to the  
19 total number of trains is close to 40% for a 100-year flood event. For the Continental  
20 and Southwest Basins, the value is close to zero. The high impacts of daily affected trains  
21 observed in the central and eastern area are due to a significantly higher railway line

1 density and daily train flows compared to the more inland river basins (see Fig. 3). The  
2 higher annual failure probability of the rail segments in the central and eastern regions  
3 shown in Fig. 4 also causes a large chance of failed railway segments per flood event  
4 and results in higher impact. The daily detoured trains in the Huaihe and Haihe River  
5 Basins in eastern China are higher compared to other basins, which leads to a large total  
6 increased time when one flood occurs. The reason is that the Huaihe and Haihe River  
7 Basins are located in eastern China and only cross railway lines in the eastern coastal  
8 area; therefore, the affected trains have more detour options through the lines of the  
9 Yangtze and Yellow River Basins, which lead to more detoured trains and associated  
10 total increased time.

### 11 **3.4 Risk uncertainty and parameters sensitivity**

12 Figure 8 and Appendix Fig. A. 6 present the sensitivity of the results to the assumed  
13 parameters and the range of performance metric uncertainty. Overall, from the  
14 uncertainty histograms, we can see that all the performance metrics are right-skewed,  
15 especially for the average daily affected and affected passengers shown in Fig. 8a and c,  
16 and average daily cancelled trains and cancelled passengers shown in Appendix Fig. A  
17 6b and d, they have a long right tail for high performance loss estimates. This seems a  
18 little bit less for the average daily detoured trains and passengers showed in Appendix  
19 Fig. A 6a and c, and average increased time for detoured trains showed in Fig. 8e, which  
20 is probably the result of the assumption that detouring is impossible when the

1 increased time for re-routing is greater than 24 hours, resulting in a smaller range of  
 2 detoured options and thus a smaller range in resulting performance loss estimates. The  
 3 average number of daily affected trains ranges from 100 to 500 trips; for daily affected  
 4 passengers, it is range from 100,000 to 450,000 people, and the average increased time  
 5 ranges from 3.5 hours to 5.5 hours with the change in the parameters. The results show  
 6 that the performance loss estimates are particularly sensitive to the values used for the  
 7 design standards; using the different parameter settings, we see a variation in the  
 8 design standards of approximately 43%. The variation in the drainage capacity rate and  
 9 water level threshold produces similar uncertainty as the capacity loss, which is  
 10 approximately 28%.

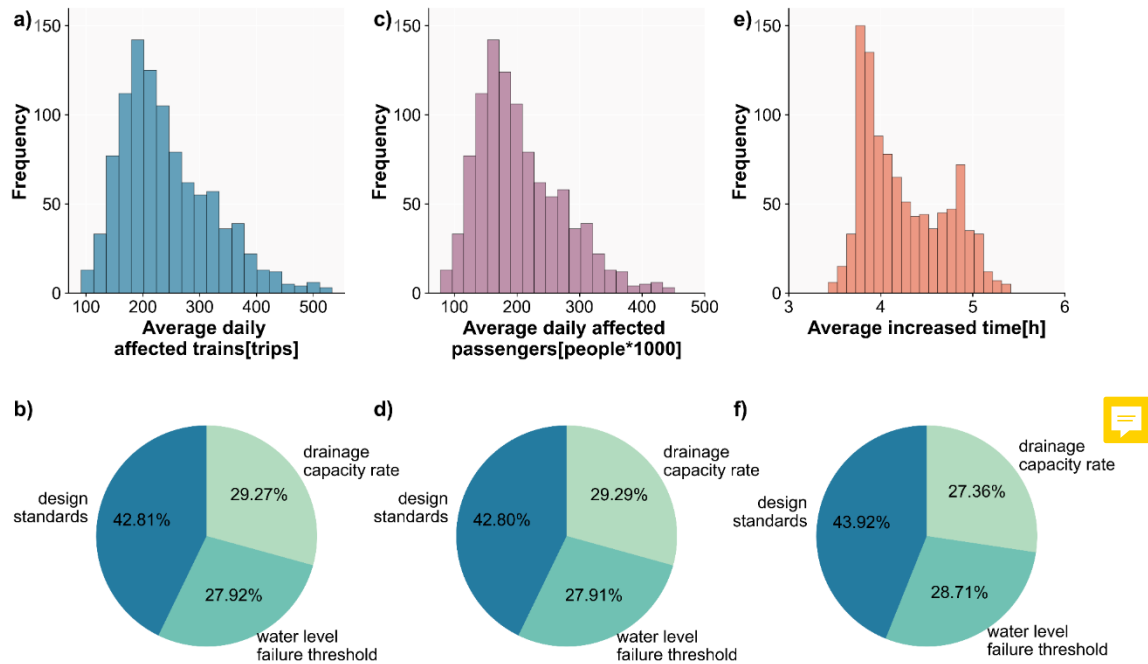

11  
 12 **Fig. 8 Results of the uncertainty (histograms) and sensitivity (pie charts) analyses for the**  
 13 **performance metrics. a) and b) average daily affected trains; c) and d) average daily affected**  
 14 **passengers; e) and f) average increased time. Fig A. 5 provides the results of the other**

1 *performance metrics.*

## 2 4 Discussion

3 Our results reveal clear geographical disparities in the failure hotspots. Areas with  
4 high annual failure probabilities are mainly located in the Yangtze River Basin, Southeast  
5 Basin, and Pearl River Basin. Comparing the failure probability from this study with the  
6 susceptibility map presented in seminal works by Liu et al. (2018a, 2018b), we find some  
7 differences in hotspots in Xinjiang Province and along the Beijing-Shanghai line. In our  
8 study, we find lower failure probabilities relative to the work of Liu et al. For other  
9 regions, the spatial patterns are similar. Our study considers the same protection  
10 standards (the water level failure threshold, drainage capacity rate, and design standard)  
11 for the railway lines in the Chinese railway system. It should be noted that these  
12 standards will not remain constant over time, as a result of ageing infrastructure. This  
13 means that the failure probability in some areas in this study is biased compared to  
14 research based on historical data. Indeed, many older lines have been  
15 upgraded/improved so that the protection standards are more consistent with newer  
16 lines.

17 In our work, we find that in the Yangtze River Basin, the median relative cancelled  
18 trains to total daily trains is between 0 and 14% when the flood intensity is between 25  
19 and 50-year. In 2016, from May to July, the Yangtze River Basin and Huaihe River Basin  
20 suffered by severely rainfall (Lyu et al., 2018). In most affected areas within the Yangtze

1 River Basin, the floods that occurred exceeded the 25-year return period. Floods caused  
2 disruptions on several railway lines, including the Chengdu-Chongqing line, Hefei-  
3 Jiujiang line, and Sichuan-Guizhou line, that cross the Yangtze River Basin. In the Huaihe  
4 River Basin, damage occurred to the Beijing-Guangzhou line. From 30 June to 6 July,  
5 approximately 100 trips (approximately 2% of the daily trains) were cancelled every day  
6 for the Chinese railway system. These observed impacts are within the range of our  
7 estimates.

8 In this study, we assumed that within a river basin, the flood probability is constant,  
9 whilst among different basins it is fully independent. In future work, we will assess the  
10 dependence structure of flood hazards within and between basins, for example, by  
11 means of the copula approach as presented in (Jongman et al., 2014). As we assumed  
12 a disruption time of one day due to the lack of information on flood duration in this  
13 study, we may have underestimated the operational performance losses.

14 Using our current approach, the performance loss can be used as the start of the  
15 indirect risk assessment from the travel journey perspective. By combining the ticket  
16 prices and the operating cost per kilometre, the economic loss for the railway company  
17 can be calculated based on the affected trains and associated passengers (Lamb et al.,  
18 2019). As a key mode of transport for interregional trade, the failure of railway systems  
19 can produce large shocks for industries dependent on the supply that may come from  
20 flooded businesses. The risk values per province (such as expected daily cancelled trains  
21 and passengers) can be used as indicators to link with business disruptions. Future work

1 can try to assess the interregional trade based on the Input and Output table and  
2 regional railway transportation performance decreased in this work. The assessment of  
3 shocks and indirect economic losses induced by railway system failures is essential for  
4 policymakers to design railway infrastructures and to measure indirect economic losses.

## 5 5 Conclusion

6 The increased frequency of extreme flood events, coupled with interregional trade  
7 growth, requires national- and global-scale transportation networks to be more resilient  
8 to cope with disruptive events. Evaluation of system-level vulnerability and  
9 identification of risk hotspots is a first step to enhance the robustness of the transport  
10 system. This study presents a framework for performing system-level vulnerability and  
11 risk assessments of a railway system under flooding. The developed framework couples  
12 simulated flood events with state-of-the-art network analysis to measure system  
13 disruptions caused by floods to identify risk hotspots. This work quantifies the system  
14 vulnerability and risk in terms of the performance loss of the Chinese railway system,  
15 induced by the flooding. Results show that failure hotspots, system vulnerability and  
16 the risk of the Chinese railway system under floods are highly heterogeneous. In  
17 addition, the adopted vulnerability metrics present different results in terms of the  
18 system vulnerability and risk.

19 High failure hotspots are mainly distributed in South China, i.e. Yangtze River, Pearl  
20 River and Southeast Basins. The humid subtropical climate and severe flood hazards in



1 these areas result in large chances of disruption. For the system vulnerability, the  
2 heterogeneity is largely due to a spatially imbalanced railway topology and traffic flow  
3 as well as a spatially heterogeneous hazard intensity distribution among China. In  
4 general, floods in the basins in central and eastern China have the highest impacts on  
5 the Chinese railway system. Floods in the Yangtze River Basin have the largest impact  
6 on the daily cancelled trains and associated daily cancelled passengers. In the Yangtze  
7 River Basin, the median percentage of daily affected trains to the total number trains  
8 can reach to 45% for a 1000-year flood event. In addition, floods in the Huaihe and  
9 Haihe River Basins cause the largest number of the detoured trains as well as associated  
10 increased time for the Chinese railway system compared with other basins. Finally, this  
11 work quantifies the performance risk due to flooding at the national and provincial level.  
12 We find that, at a national level, the average daily number of affected trains and  
13 passengers are approximately 200 trips and 165,000 people (2.7% and 2.8% of the total  
14 daily numbers of trains and passengers), respectively. The mean average increased time  
15 for detoured trains reaches approximately 5 hours. At the provincial level, the provinces  
16 in Central China have the highest absolute and relative risks, estimated to be over 40  
17 daily affected trains (4.5% relative to the number of the province's daily trains) and  
18 more than 35,000 daily affected passengers (3.5% relative to the number of the  
19 province's daily passengers). The high risk in terms of the total increased time is mostly  
20 distributed in East China, whereas the highest average increased time is distributed in  
21 western provinces, such as Xinjiang and Tibet Provinces. The developed system

1 vulnerability curves and flood risk maps can provide the information for the decisions  
2 on safety and effectiveness of operation and maintenance. Various performance  
3 metrics can be considered by management departments based on their particular  
4 problems.

## 5 **Code/Data availability**

6 The data in this study were analyzed with Python package, and the figures were created  
7 with ArcViewTM GIS and Python packages. All codes used in this work are available  
8 upon request.

## 9 **Author contribution**

10 Kai Liu and Weihua Zhu developed the original idea and designed the analyses. Philip  
11 Ward and Elco Koks contributed to the study design. Weihua Zhu, Kai Liu and Elco Koks  
12 conducted the analysis. Weihua Zhu wrote the original manuscript, and Kai Liu, Ming  
13 Wang, Philip Ward and Elco Koks provided comments and revised the manuscript. All  
14 the coauthors contributed to scientific interpretations of the results.

## 15 **Declaration of Competing Interest**

16 The authors declare that they have no known competing financial interests or personal  
17 relationships that could have appeared to influence the work reported in this paper.

## 18 **Acknowledgments**

19 This work was supported by the National Key Research and Development Plan [grant

1 number 2018YFC1508802]; the National Natural Science Foundation of China [grant  
 2 number 41771538]; and PJW received funding from the Dutch Research Council (NWO),  
 3 in the form of a VIDI grant [grant number 016.161.324]. EEK received funding from the  
 4 Dutch Research Council (NWO), in the form of a VENI grant [grant number  
 5 VI.Veni.194.033]. The financial support is highly appreciated.

## 6 **References**

- 7 Alfieri, L., Burek, P., Dutra, E., Krzeminski, B., Muraro, D., Thielen, J. and Pappenberger, F.: GloFAS-global ensemble  
 8 streamflow forecasting and flood early warning, *Hydrol. Earth Syst. Sci.*, 17(3), 1161–1175, doi:10.5194/hess-17-  
 9 1161-2013, 2013.
- 10 Arnell, N. W. and Gosling, S. N.: The impacts of climate change on river flood risk at the global scale, *Clim. Change*,  
 11 134(3), 387–401, doi:10.1007/s10584-014-1084-5, 2016.
- 12 Becker, A. and Grünewald, U.: Flood Risk in Central Europe, *Science* (80-. ), 300(5622), 1099, 2003.
- 13 Benn, J.: Railway bridge failure during flooding in the UK and Ireland, *Proc. Inst. Civ. Eng. Eng.*, 166(4), 163–170, 2013.
- 14 Chang, H., Lafrenz, M., Jung, I. W., Figliozzi, M., Platman, D. and Pederson, C.: Potential impacts of climate change  
 15 on Flood-Induced Travel Disruptions: A Case Study of Portland, Oregon, USA, *Ann. Assoc. Am. Geogr.*, 100(4), 938–  
 16 952, doi:10.1080/00045608.2010.497110, 2010.
- 17 College of Urban and Environmental Science, P. U. (<http://geodata.pku.edu.cn>): Geographic Data Sharing  
 18 Infrastructure, n.d.
- 19 CRPH: High-speed railway emergency response plan., 2012.
- 20 CRPH: Code for design of railway earth structure, TB10001, 2016.

1 Dottori, F., Salamon, P., Bianchi, A., Alfieri, L., Hirpa, F. A. and Feyen, L.: Development and evaluation of a framework  
2 for global flood hazard mapping, Adv. Water Resour., 94, 87–102,  
3 doi:<https://doi.org/10.1016/j.advwatres.2016.05.002>, 2016.

4 Editorial Board of China Railway Yearbook, Ed.: China railway yearbook, China Railway Publishing House, Beijing.,  
5 2001.

6 Editorial Board of China Railway Yearbook, Ed.: China railway yearbook, China Railway Publishing House, Beijing.,  
7 2002.

8 Editorial Board of China Railway Yearbook, Ed.: China railway yearbook, China Railway Publishing House, Beijing.,  
9 2003.

10 Editorial Board of China Railway Yearbook, Ed.: China railway yearbook, China Railway Publishing House, Beijing.,  
11 2004.

12 Editorial Board of China Railway Yearbook, Ed.: China railway yearbook, China Railway Publishing House, Beijing.,  
13 2005.

14 Editorial Board of China Railway Yearbook, Ed.: China railway yearbook, China Railway Publishing House, Beijing.,  
15 2006.

16 Editorial Board of China Railway Yearbook, Ed.: China railway yearbook, China Railway Publishing House, Beijing.,  
17 2007.

18 Editorial Board of China Railway Yearbook, Ed.: China railway yearbook, China Railway Publishing House, Beijing.,  
19 2008.

20 Editorial Board of China Railway Yearbook, Ed.: China railway yearbook, China Railway Publishing House, Beijing.,  
21 2009.

- 1 Editorial Board of China Railway Yearbook, Ed.: China railway yearbook, China Railway Publishing House, Beijing.,
- 2 2010.
- 3 Editorial Board of China Railway Yearbook, Ed.: China railway yearbook, China Railway Publishing House, Beijing.,
- 4 2011.
- 5 Editorial Board of China Railway Yearbook, Ed.: China railway yearbook, China Railway Publishing House, Beijing.,
- 6 2012.
- 7 Editorial Board of China Railway Yearbook, Ed.: China railway yearbook, China Railway Publishing House, Beijing.,
- 8 2013.
- 9 Editorial Board of China Railway Yearbook, Ed.: China railway yearbook, China Railway Publishing House, Beijing.,
- 10 2014.
- 11 Editorial Board of China Railway Yearbook, Ed.: China railway yearbook, China Railway Publishing House, Beijing.,
- 12 2015.
- 13 Editorial Board of China Railway Yearbook, Ed.: China railway yearbook, China Railway Publishing House, Beijing.,
- 14 2016.
- 15 Editorial Board of China Railway Yearbook, Ed.: China railway yearbook, China Railway Publishing House, Beijing.,
- 16 2017.
- 17 Espinet, X., Rozenberg, J., Ogita, K. S. R. S., Singh Rao, K. and Ogita, S.: Piloting the Use of Network Analysis and
- 18 Decision-Making under Uncertainty in Transport Operations: Preparation and Appraisal of a Rural Roads Project in
- 19 Mozambique Under Changing Flood Risk and Other Deep Uncertainties., 2018.
- 20 Fraiture, C.: Integrated water and food analysis at the global and basin level. An application of WATERSIM, WATER
- 21 Resour. Manag. -DORDRECHT-, 2007.

1 GFDRR: Tbilisi disaster needs assessment 2015., 2015.

2 Gil, J. and Steinbach, P.: From flood risk to indirect flood impact: Evaluation of street network performance for  
3 effective management, response and repair, *WIT Trans. Ecol. Environ.*, 118, 335–344, doi:10.2495/FRIAR080321,  
4 2008.

5 Gong, M., Wang, Y., Wang, S. and Liu, W.: Enhancing robustness of interdependent network under recovery based  
6 on a two-layer-protection strategy, *Sci. Rep.*, 7(1), 1–13, doi:10.1038/s41598-017-13063-2, 2017.

7 Gouldby, B. and Samuels, P. G.: Title Language of Risk - Project definitions Technical Report, , (May 2014), 2009.

8 Haimes, Y. Y.: On the complex definition of risk: A systems-based approach, *Risk Anal.*, 29(12), 1647–1654,  
9 doi:10.1111/j.1539-6924.2009.01310.x, 2009.

10 Hirabayashi, Y., Mahendran, R., Koirala, S., Konoshima, L., Yamazaki, D., Watanabe, S., Kim, H. and Kanae, S.: Global  
11 flood risk under climate change, *Nat. Clim. Chang.*, 3(9), 816–821, doi:10.1038/nclimate1911, 2013.

12 Hong, L., Ouyang, M., Peeta, S., He, X. and Yan, Y.: Vulnerability assessment and mitigation for the Chinese railway  
13 system under floods, *Reliab. Eng. Syst. Saf.*, 137(January 2018), 58–68, doi:10.1016/j.ress.2014.12.013, 2015.

14 Horacio, J., Ollero, A., Noguera, I. and Fernández-Pasquier, V.: Flooding, channel dynamics and transverse  
15 infrastructure: a challenge for Middle Ebro river management, *J. Maps*, 5647, doi:10.1080/17445647.2019.1592719,  
16 2019.

17 Huang, C. and Nivolianitou, Z. S.: Risk analysis based on data and crisis response beyond knowledge: Proceedings of  
18 the 7th International Conference on Risk Analysis and Crisis Response, CRC Press, Athens, Greece., 2019.

19 Janic, M. and Vleugel, J.: Estimating potential reductions in externalities from rail–road substitution in Trans-  
20 European freight transport corridors, *Transp. Res. Part D Transp. Environ.*, 17(2), 154–160,  
21 doi:https://doi.org/10.1016/j.trd.2011.09.015, 2012.

1 Jongman, B., Hochrainer-Stigler, S., Feyen, L., Aerts, J. C. J. H., Mechler, R., Botzen, W. J. W., Bouwer, L. M., Pflug, G.,  
2 Rojas, R. and Ward, P. J.: Increasing stress on disaster-risk finance due to large floods, *Nat. Clim. Chang.*, 4(4), 264–  
3 268, doi:10.1038/nclimate2124, 2014.

4 Kellermann, P., Schöbel, A., Kundela, G. and Thieken, A. H.: Estimating flood damage to railway infrastructure - The  
5 case study of the March River flood in 2006 at the Austrian Northern Railway, *Nat. Hazards Earth Syst. Sci.*, 15(11),  
6 2485–2496, doi:10.5194/nhess-15-2485-2015, 2015.

7 Kellermann, P., Schönberger, C. and Thieken, A. H.: Large-scale application of the flood damage model RAILway  
8 Infrastructure Loss (RAIL), *Nat. Hazards Earth Syst. Sci.*, 16(11), 2357–2371, doi:10.5194/nhess-16-2357-2016, 2016.

9 Koks, E. E. and Haer, T.: A high-resolution wind damage model for Europe, *Sci. Rep.*, 10(1), 1–11,  
10 doi:10.1038/s41598-020-63580-w, 2020.

11 Koks, E. E., Rozenberg, J., Zorn, C., Tariverdi, M., Voudoukas, M., Fraser, S. A., Hall, J. W. and Hallegatte, S.: A global  
12 multi-hazard risk analysis of road and railway infrastructure assets, *Nat. Commun.*, 10(1), 1–11, doi:10.1038/s41467-  
13 019-10442-3, 2019.

14 Kundzewicz, Z., IwonaPińskwar and Robertbrakenridge, G.: Large floods in Europe, 1985–2009, *Int. Assoc. Sci. Hydrol.*  
15 *Bull.*, 2013.

16 Lamb, R., Garside, P., Pant, R. and Hall, J. W.: A Probabilistic Model of the Economic Risk to Britain’s Railway Network  
17 from Bridge Scour During Floods, *Risk Anal.*, doi:10.1111/risa.13370, 2019.

18 Lavers, D. A., Allan, R. P., Villarini, G., Lloydhughes, B., Brayshaw, D. J. and Wade, A. J.: Future changes in atmospheric  
19 rivers and their implications for winter flooding in Britain, *Environ. Res. Lett.*, 8(3), 34010, 2013.

20 Liu, K., Wang, M., Cao, Y., Zhu, W., Wu, J. and Yan, X.: A comprehensive risk analysis of transportation networks  
21 affected by rainfall-Induced multihazards, *Risk Anal.*, 38(8), 1618–1633, doi:10.1111/risa.12968, 2018.

1 Liu, X., Chen, X. and Wang, S.: Evaluating and predicting shadow prices of water resources in China and its nine major  
2 river basins, *Water Resour. Manag.*, 23(8), 1467–1478, doi:10.1007/s11269-008-9336-7, 2009.

3 Lyu, H. M., Xu, Y. S., Cheng, W. C. and Arulrajah, A.: Flooding hazards across Southern China and prospective  
4 sustainability measures, *Sustain.*, 10(5), 1–18, doi:10.3390/su10051682, 2018.

5 Marsden, M. J.: Quadratic spline interpolation, *Bull. Am. Math. Soc.*, 80(5), 903–906, doi:10.1090/S0002-9904-1974-  
6 13566-4, 1974.

7 Meshram, S. G., Powar, P. L. and Meshram, C.: Comparison of cubic, quadratic, and quintic splines for soil erosion  
8 modeling, *Appl. Water Sci.*, 8(6), 1–7, doi:10.1007/s13201-018-0807-6, 2018.

9 Metropolis: The beginning of the Monte Carlo method, *Cambridge Press*. 1638-1692, 1–20,  
10 doi:10.9783/9781512808797-001, 1987.

11 de Moel, H. and Aerts, J. C. J. H.: Effect of uncertainty in land use, damage models and inundation depth on flood  
12 damage estimates, *Nat. Hazards*, 58(1), 407–425, doi:10.1007/s11069-010-9675-6, 2011.

13 De Moel, H., Asselman, N. E. M. and H. Aerts, J. C. J.: Uncertainty and sensitivity analysis of coastal flood damage  
14 estimates in the west of the Netherlands, *Nat. Hazards Earth Syst. Sci.*, 12(4), 1045–1058, doi:10.5194/nhess-12-  
15 1045-2012, 2012.

16 Moran, A. P., Thieken, A. H., Schöbel, A. and Rachoy, C.: Documentation of flood damage on railway infrastructure,  
17 *Data Mobility*, pp. 61-70. Springer, Berlin, Heidelb., 81, 61–70, doi:10.1007/978-3-642-15503-1\_6, 2010.

18 Newman, M. E. .: *Networks An Introduction*, Oxford University Press, United States., 2010.

19 Nones, M. and Pescaroli, G.: Implications of cascading effects for the EU Floods Directive, *Int. J. River Basin Manag.*,  
20 14(2), 195–204, doi:10.1080/15715124.2016.1149074, 2016.

21 Pregnotato, M., Ford, A., Wilkinson, S. M. and Dawson, R. J.: The impact of flooding on road transport: A depth-



1 disruption function, *Transp. Res. Part D Transp. Environ.*, 55, 67–81, doi:10.1016/j.trd.2017.06.020, 2017.

2 Prudhomme, C. and Genevier, M.: Can atmospheric circulation be linked to flooding in Europe?, *Hydrol. Process.*,  
3 25(7), 1180–1190, doi:10.1002/hyp.7879, 2011.

4 Reed, D. W.: A review of British railway bridge flood failures, *Hydrol. Sci. Pract. 21st Century*, I(Table 1), 210–216  
5 [online] Available from:  
6 [https://www.researchgate.net/profile/Duncan\\_Reed/publication/267254265\\_A\\_review\\_of\\_British\\_railway\\_bridge](https://www.researchgate.net/profile/Duncan_Reed/publication/267254265_A_review_of_British_railway_bridge_flood_failures/links/5512efd60cf240060b2df24c.pdf)  
7 [\\_flood\\_failures/links/5512efd60cf240060b2df24c.pdf](https://www.researchgate.net/profile/Duncan_Reed/publication/267254265_A_review_of_British_railway_bridge_flood_failures/links/5512efd60cf240060b2df24c.pdf), 2004.

8 Rezvani, Z., Jansson, J. and Bodin, J.: Advances in consumer electric vehicle adoption research: A review and research  
9 agenda, *Transp. Res. Part D Transp. Environ.*, 34, 122–136, doi:10.1016/j.trd.2014.10.010, 2015.

10 Rodrigue, J.-P.: *The geography of transport systems*, Taylor & Francis., 2016.

11 Rojas, R., Feyen, L. and Watkiss, P.: Climate change and river floods in the European Union: Socio-economic  
12 consequences and the costs and benefits of adaptation, *Glob. Environ. Chang.*, 23(6), 1737–1751,  
13 doi:10.1016/J.GLOENVCHA.2013.08.006, 2013.

14 Sene, K.: Flood warning, forecasting and emergency response, *Flood Warn. Forecast. Emerg. Response*, 1–303,  
15 doi:10.1007/978-3-540-77853-0, 2008.

16 Singh, P., Sinha, V. S. P., Vijhni, A. and Pahuja, N.: Vulnerability assessment of urban road network from urban flood,  
17 *Int. J. Disaster Risk Reduct.*, 28(December 2017), 237–250, doi:10.1016/j.ijdr.2018.03.017, 2018.

18 Speight, L. J., Hall, J. W. and Kilsby, C. G.: A multi-scale framework for flood risk analysis at spatially distributed  
19 locations, *J. Flood Risk Manag.*, 10(1), 124–137, doi:10.1111/jfr3.12175, 2017.

20 Sun, W. and Yuan, Y.-X.: *Optimization theory and methods: nonlinear programming*, Springer Science & Business  
21 Media., 2006.

- 1 UNISDR: Global Assessment Report on Disaster Risk Reduction. Revealing Risk, Redefining Development, 2011.
- 2 Vandebogert, K.: Method of quadratic interpolation, , 1–22, 2017.
- 3 Ward, Jongman, B., Weiland, F. S., Bouwman, A., Van Beek, R., Bierkens, M. F. P., Ligtoet, W. and Winsemius, H. C.:
- 4 Assessing flood risk at the global scale: Model setup, results, and sensitivity, Environ. Res. Lett., 8(4),
- 5 doi:10.1088/1748-9326/8/4/044019, 2013.
- 6 Wei, S., Yuan, J., Qiu, Y., Luan, X., Han, S., Zhou, W. and Xu, C.: Exploring the potential of open big data from ticketing
- 7 websites to characterize travel patterns within the Chinese high-speed rail system, PLoS One, 12(6), 1–13,
- 8 doi:10.1371/journal.pone.0178023, 2017.
- 9 Winsemius, H. C., Van Beek, L. P. H., Jongman, B., Ward, P. J. and Bouwman, A.: A framework for global river flood
- 10 risk assessments, Hydrol. Earth Syst. Sci., 17(5), 1871–1892, doi:10.5194/hess-17-1871-2013, 2013.
- 11 Wu, Q.: Risk analysis of seismic hazard correlation between nuclear power plants, in Risk Analysis Based on Data and
- 12 Crisis Response Beyond Knowledge, pp. 550–556, CRC Press., 2019.
- 13 Yang, D., Pan, K. and Wang, S.: On service network improvement for shipping lines under the one belt one road
- 14 initiative of China, Transp. Res. Part E Logist. Transp. Rev., 117, 82–95, doi:https://doi.org/10.1016/j.tre.2017.07.003,
- 15 2018.

# 1 Appendix

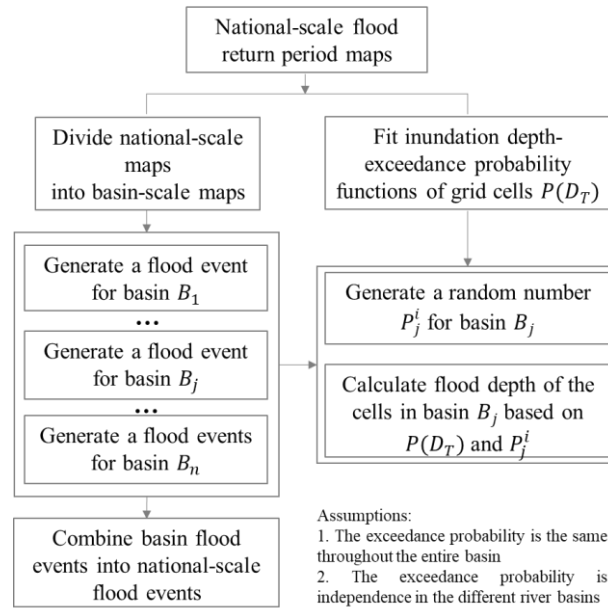

**Fig.A. 1 A flowchart to generate flood event**

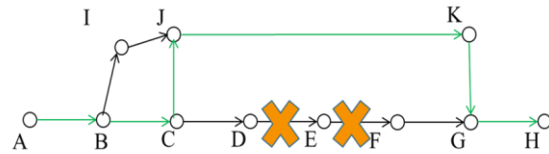

Railway network

Network nodes: A – K

Network edges: AB, ..., KG

Train trips information:

Trip1: A → B → C → D → E → F → G → H (passed and stopped stations)

DE and EF are disrupted by the flood event.

Two routes can complete the detour:

A-B-I-J-K-G-H

A-B-C-J-K-G-H

Based on the 'Pass the most original stations', the green routes have been chosen for detour.

**Fig. A. 2 An example for detour**

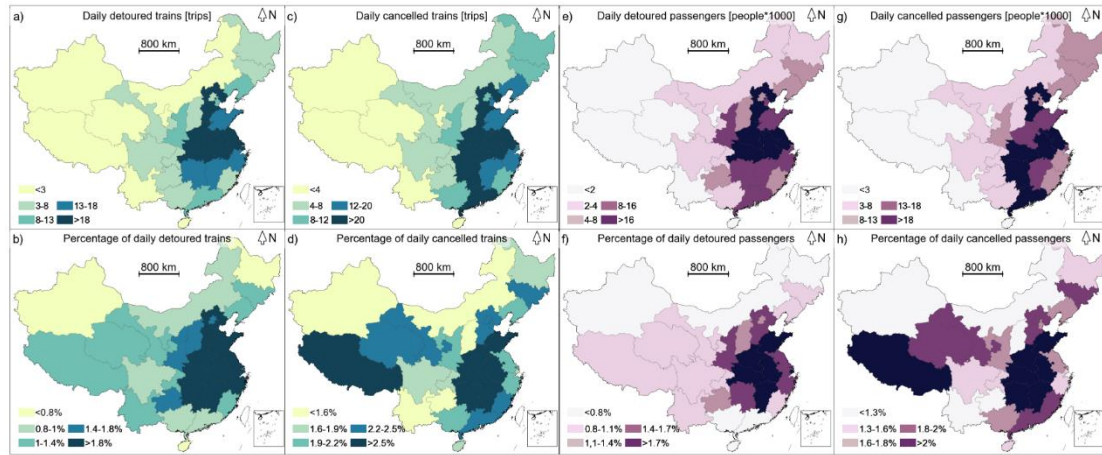

**Fig. A. 3 Performance loss of the railway system per province.** a) presents the daily detoured trains in absolute terms; b) presents the daily detoured trains relative to the number of the province's daily trains; c) presents the daily cancelled trains in absolute terms; d) presents the daily cancelled trains relative to the number of the province's daily trains; e) presents the daily detoured passengers in absolute terms; f) presents the daily detoured passengers relative to the number of the province's daily trains; g) presents the daily cancelled passengers in absolute terms; h) presents the daily cancelled passengers relative to the number of the province's daily trains.

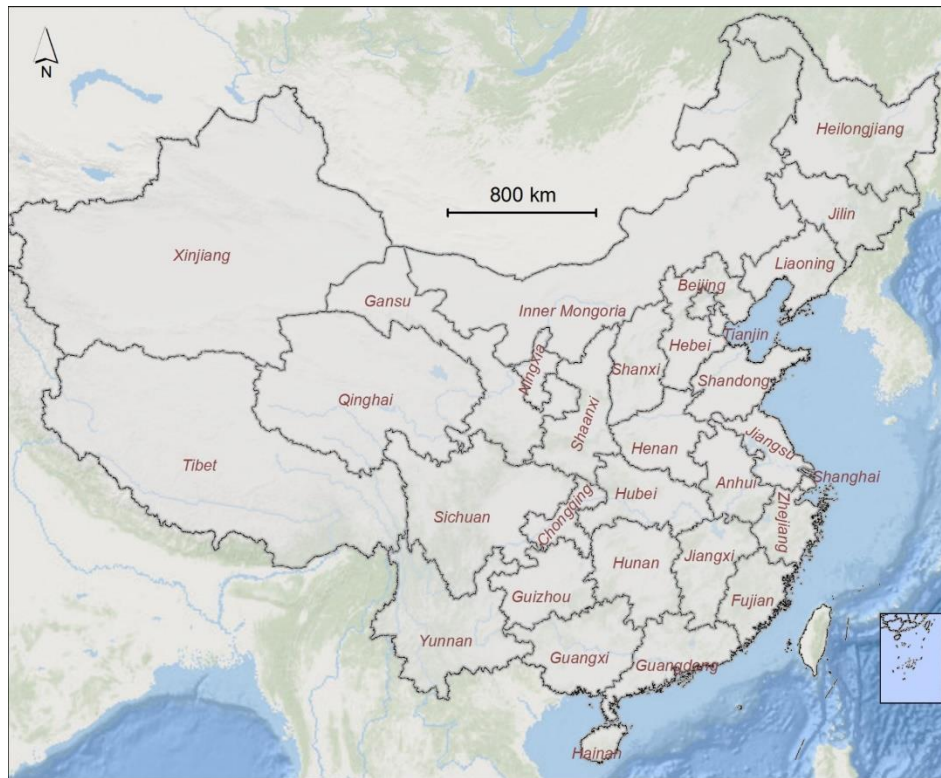

**Fig. A. 4 Chinese provinces distribution map**

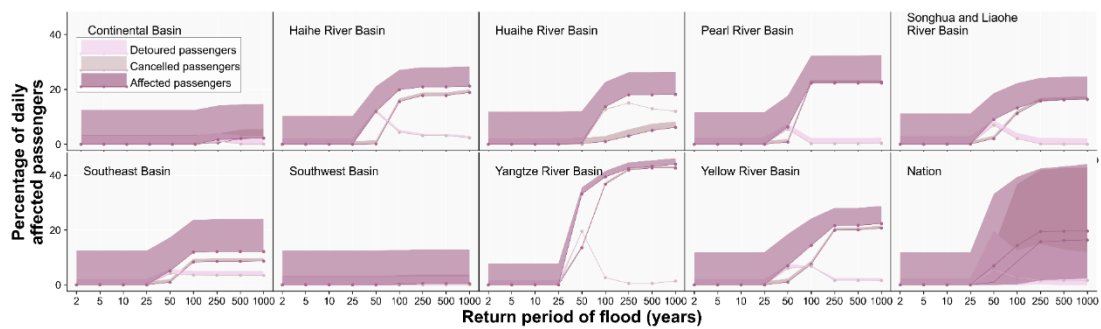

**Fig. A. 5 system-vulnerability curves of passenger's metrics**

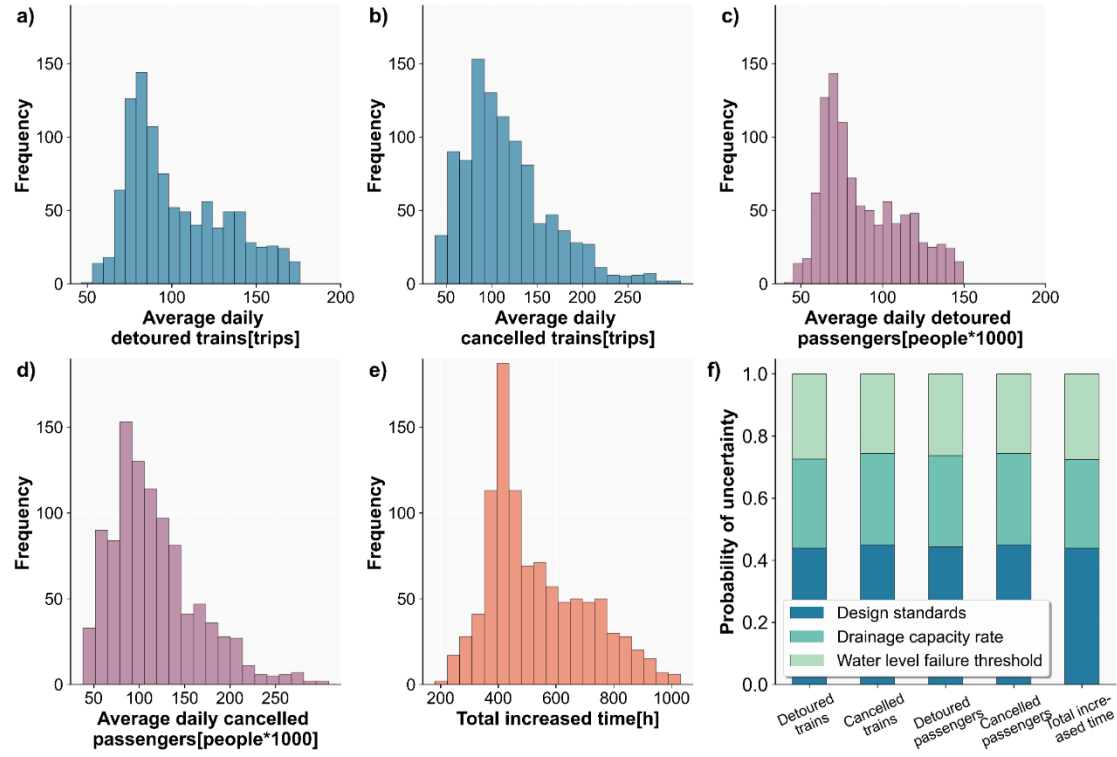

**Fig. A. 6 Results of the uncertainty and sensitivity analyses for the performance metrics. a) average daily detoured trains; b) average daily cancelled trains; c) average daily detoured passengers; d) average daily cancelled passengers; e) total increased time; f) the sensitivity results.**

1 Table A 1 List of variables

| List of variables |                                                                                                                    |
|-------------------|--------------------------------------------------------------------------------------------------------------------|
| Variable          | Description                                                                                                        |
| $T$               | Return period of $T$ - year                                                                                        |
| $D_T$             | The flood depth with return period of $T$ - year                                                                   |
| $g_{x,y}$         | A grid cell with longitude $x$ and latitude $y$                                                                    |
| $D_{T,x,y}$       | The flood depth of a flood event of grid cell $g_{x,y}$ with return period of $T$ - year                           |
| $P(D_T)$          | The annual exceedance probability of flood depth $D_T$                                                             |
| $Pr(D_T)$         | A quadratic, continuously differentiable function of $P(D_T)$                                                      |
| $Pr_{x,y}(D_T)$   | A set of continuous inundation depth-exceedance probability functions for $g_{x,y}$                                |
| a, b, c           | Constant parameters in function $Pr_{x,y}(D_T)$                                                                    |
| $B_j$             | River basin $j$                                                                                                    |
| $E_j^i$           | Flood event $i$ in river basin $B_j$                                                                               |
| $P_j^i$           | A random number between 0 and 1 for flood event $E_j^i$ in basin $B_j$                                             |
| $Wd$              | The failure threshold of the railway service after drainage, default value is 0.2                                  |
| $WL_{x,y}$        | The water level after drainage of grid cell $g_{x,y}$                                                              |
| $Wld_{x,y}$       | The water level of the flood depth under design standard of grid cell $g_{x,y}$                                    |
| $Dc$              | The drainage capacity rate of Chinese railway system, default value is 0.8                                         |
| $Z(xy)$           | The failure condition of grid cell $g_{x,y}$                                                                       |
| $l_{ij}$          | Rail segment between station $i$ and station $j$                                                                   |
| $Fc_{ij}$         | Failure condition of component $l_{ij}$                                                                            |
| $FC_{ij}^e$       | The failure condition of railway segment $l_{ij}$ under flood event $e$                                            |
| $AF_{ij}$         | The annual failure probability of rail segment $l_{ij}$                                                            |
| $E$               | The N-year flood events catalogue                                                                                  |
| $N_s$             | The original number of trains in the system                                                                        |
| $N_e^s$           | The number of running trains in the system after a flood event                                                     |
| $N_e^{tol}$       | The number of daily affected trains under flood event $e$                                                          |
| $N_e^c$           | The number of daily is cancelled trains under flood event $e$                                                      |
| $N_e^d$           | The number of daily detoured trains under flood event $e$                                                          |
| $CA_i$            | The capacity of the $i$ th train                                                                                   |
| $P_e^{tol}$       | The number of affected passengers                                                                                  |
| $P_e^c$           | The number of daily passengers is cancelled passengers under flood event $e$                                       |
| $P_e^d$           | The number of daily passengers is detoured passengers under flood event $e$                                        |
| $T_i$             | The original travelling time of the $i$ th train.                                                                  |
| $T_i^e$           | The running time of the $i$ th train under flood event $e$                                                         |
| $T_e^{tol}$       | The total increased time for detoured trains under flood event $e$                                                 |
| $T_e^{ave}$       | The average increased time under flood event $e$                                                                   |
| $AR_s$            | The expected daily flood risk level to the railway system                                                          |
| $V_e$             | Performance loss metric, including $N_e^d, N_e^c, N_e^{tol}, P_e^d, P_e^c, P_e^{tol}, T_e^{tol}$ , and $T_e^{ave}$ |

- 1 Table A 2 List of all assumptions taken in this study and their range in the sensitivity analysis

| List of all assumptions taken in this study and their range in the sensitivity analysis |                |              |
|-----------------------------------------------------------------------------------------|----------------|--------------|
| Varying parameter                                                                       | Default values | Range        |
| water level failure threshold                                                           | 0.2            | [0.1m, 0.5m] |
| drainage capacity rate                                                                  | 0.8            | [0.7, 0.9]   |
| design standards                                                                        | 100            | [50, 100]    |

- 2
